# Supplementary material for: The protective mechanism of taurine deoxycholic acid (TCDCA) through LPAR1 regulation in Buga syndrome
Source: Research Square preprint supplement (doi:10.21203/rs.3.rs-6817130/v1), 2025-06-12
Supplement: Supplementary file 1 [file 4539631270bf425191afb399.docx]

**Supplementary Materials: Description for Figure S1**

**Bioinformatic analysis of LPAR1 regulation under TCDCA treatment.**

To further investigate the regulatory role of TCDCA on LPAR1, transcriptomic data were analyzed in depth. Differential expression analysis revealed that LPAR1 was significantly upregulated following TCDCA treatment. The subsequent protein–protein interaction (PPI) network showed strong associations between LPAR1 and several inflammation- and angiogenesis-related proteins, including TBXA2R and LPAR2. Furthermore, GO and KEGG enrichment analyses indicated that the differentially expressed genes were predominantly involved in biological processes such as cell migration, angiogenesis, and inflammatory signaling pathways. These results support the hypothesis that LPAR1 may serve as a central mediator in the TCDCA-induced functional modulation of endothelial cells. Detailed results are presented in Supplementary Figure S1.


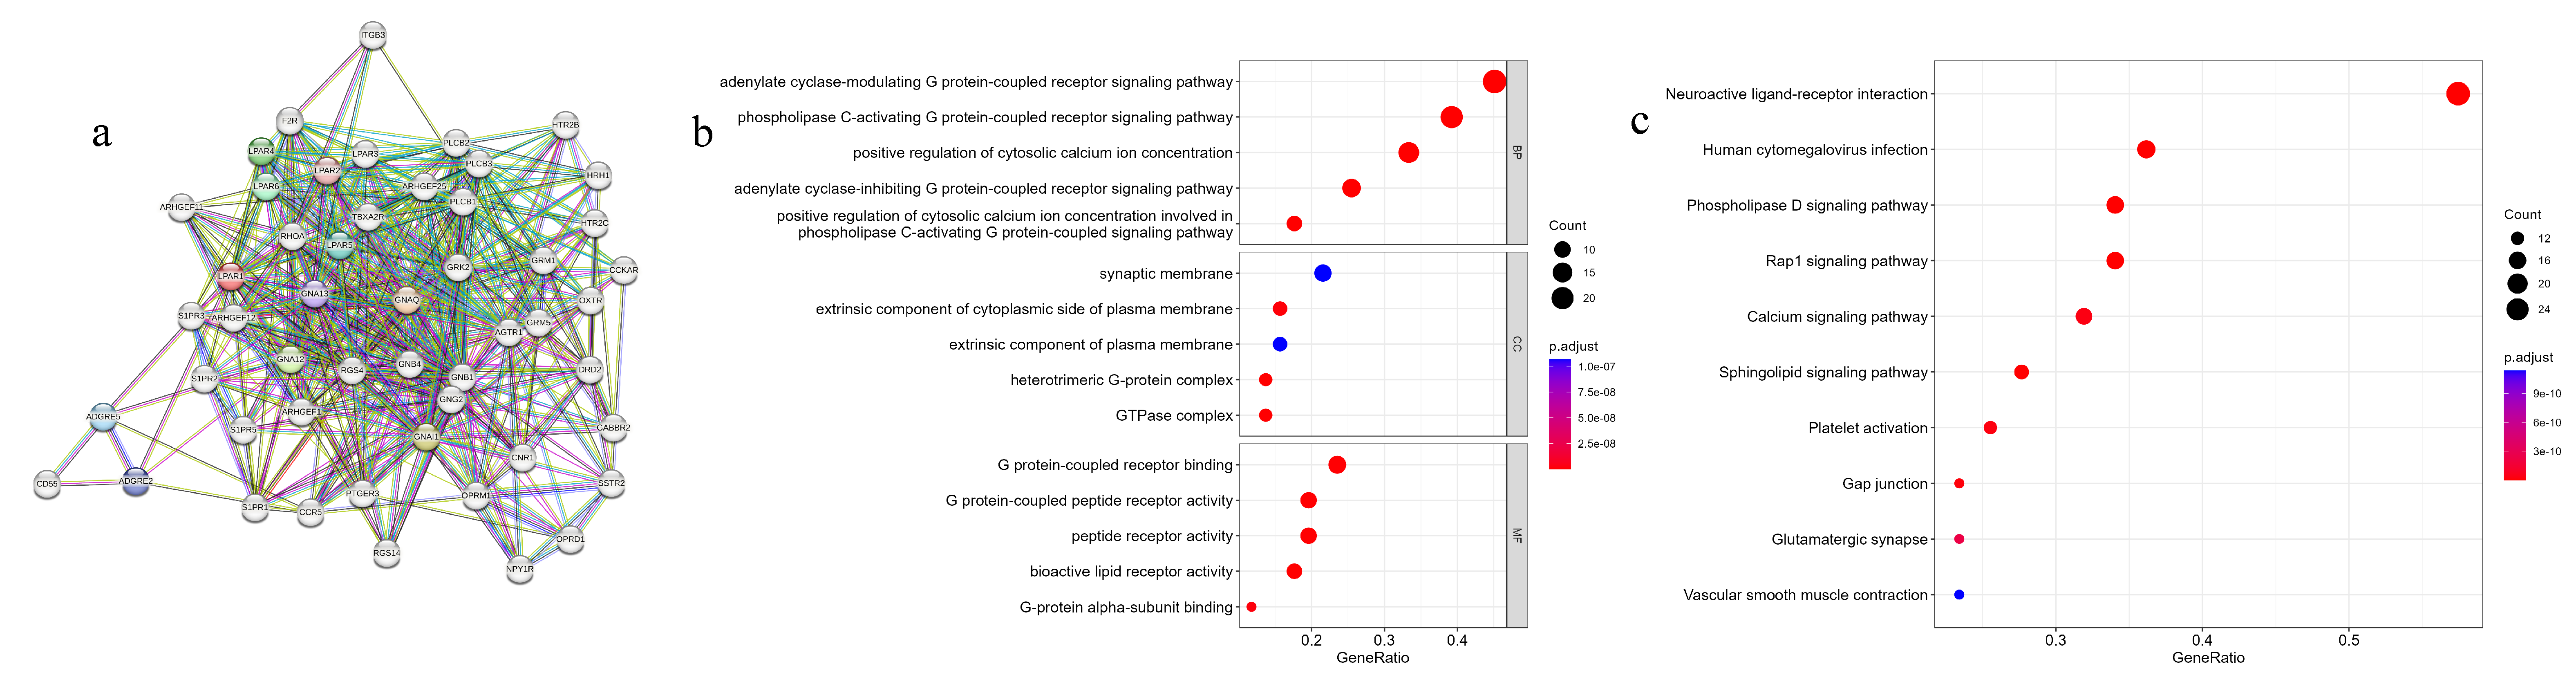


Supplementary Figure S1. Bioinformatic analysis of LPAR1 regulation under TCDCA treatment.(a) PPI network centered around LPAR1.(b, c) GO and KEGG enrichment analyses of differentially expressed genes.
